# Supplementary material
Source: Royal Society of Chemistry journal article supplement (doi:10.1039/d6cy00251j)
Supplement: d6cy00251j1.pdf [file d6cy00251j1.pdf]

## Supporting Information

### **Sulfonated perylene bisimide-based conjugated organic polymer for simultaneous bisphenol A degradation and hydrogen peroxide production**

**Authors:** *Yuzhe Zhang<sup>a†</sup>, Aomei Li<sup>a†</sup>, Zhenhao Fan<sup>a†</sup>, Danfeng Wang<sup>b</sup>, Shiyuan Zhou<sup>b\*</sup>, Guangfeng Liu<sup>b\*</sup>, Peiyang Gu<sup>b</sup>, Zhongyu Li<sup>a\*</sup>*

#### **Affiliations:**

<sup>a</sup> *School of Environmental Science and Engineering, Changzhou University, Changzhou 213164, China. E-mail: zhongyuli@mail.tsinghua.edu.cn*

<sup>b</sup> *Jiangsu Key Laboratory of Advanced Catalytic Materials and Technology, School of Petrochemical Engineering, Changzhou University, Changzhou 213164, China. E-mail: [zhoushiyuan@cczu.edu.cn](mailto:zhoushiyuan@cczu.edu.cn); [guangfeng.liu@cczu.edu.cn](mailto:guangfeng.liu@cczu.edu.cn).*

<sup>†</sup> *These authors contributed equally to this work.*

## Contents

**Scheme S1** The schematic illustration of the synthetic procedure of PDI-CH<sub>3</sub>-Cz

**Fig. S1** The <sup>1</sup>H NMR spectrum of PDI-CH<sub>3</sub>-Cz

**Fig. S2** The XPS spectra of PPDI-C and PPDI-SO<sub>3</sub>H

**Fig. S3** The XRD images of (a) PPDI-C and (b) PPDI-SO<sub>3</sub>H

**Fig. S4** The SEM images of (a) PPDI-C and (b) PPDI-SO<sub>3</sub>H

**Fig.S5** Cyclic stability of H<sub>2</sub>O<sub>2</sub> production over PPDI-SO<sub>3</sub>H and PPDI-C

**Fig. S6** Photodegradation and dark adsorption of different concentrations of BPA by PPDI-C

**Fig. S7** The quenching experiment of PPDI-SO<sub>3</sub>H in H<sub>2</sub>O<sub>2</sub> generation under an O<sub>2</sub> atmosphere

**Fig. S8** Time-dependent FTIR analysis of PPDI-SO<sub>3</sub>H

**Table S1.** The comparison of the removal performance of PPDI-SO<sub>3</sub>H toward BPA under visible light irradiation

## 1. Results and discussion

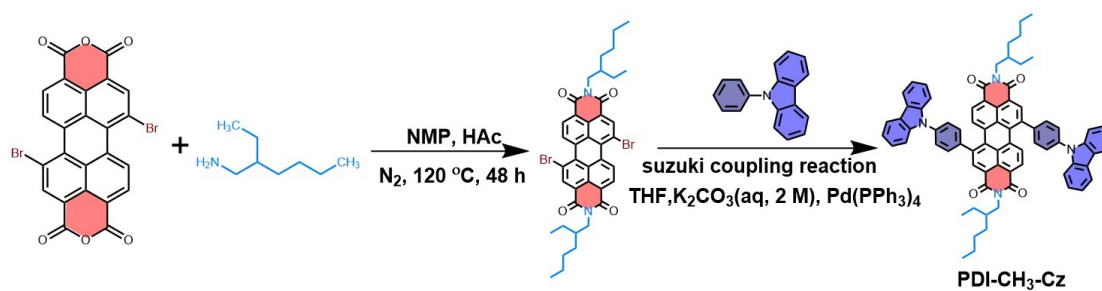

**Scheme S1** The schematic illustration of the synthetic procedure of PDI-CH<sub>3</sub>-Cz

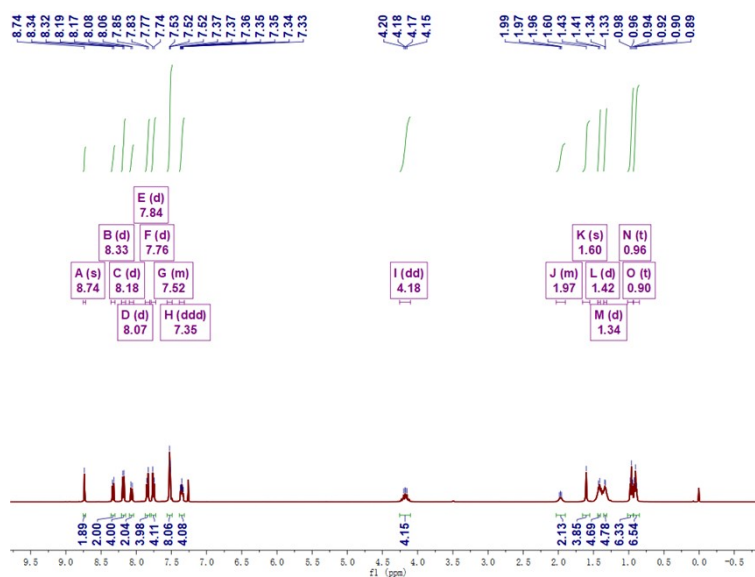

**Fig. S1** The <sup>1</sup>H NMR spectrum of PDI-CH<sub>3</sub>-Cz.

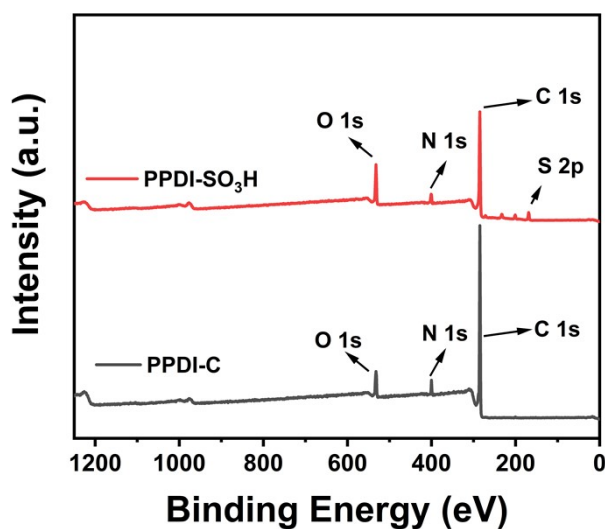

**Fig. S2** The XPS spectra of PPDI-C and PPDI-SO<sub>3</sub>H.

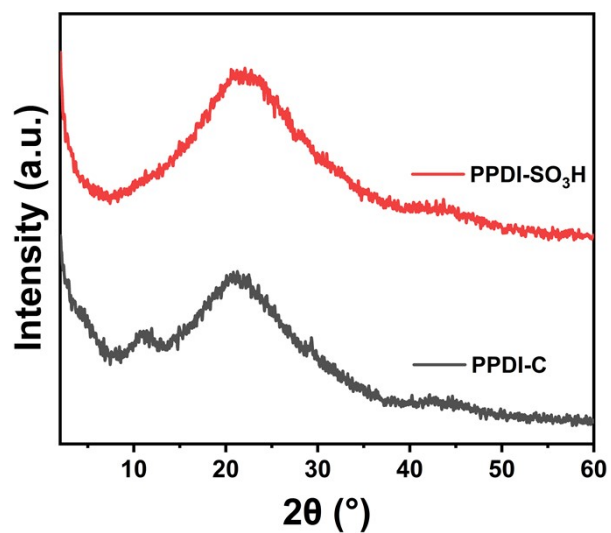

**Fig. S3** The XRD curves of PPDI-C and PPDI-SO<sub>3</sub>H.

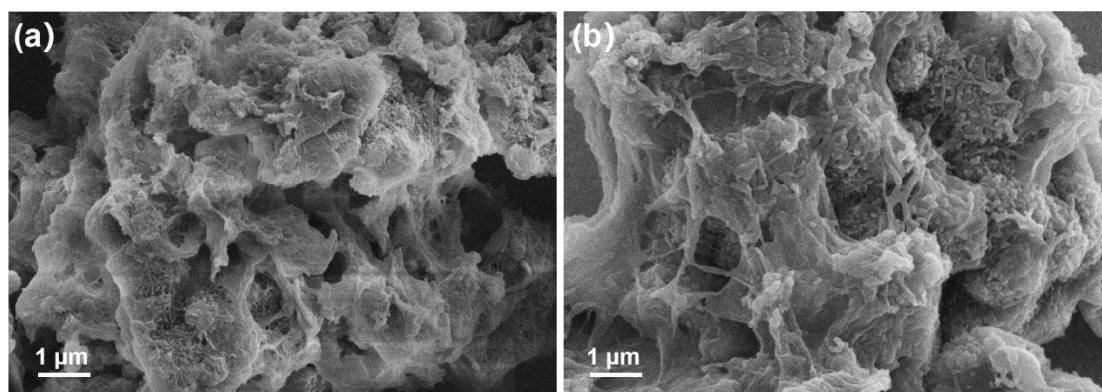

**Fig. S4** The SEM images of (a) PPDI-C and (b) PPDI-SO<sub>3</sub>H.

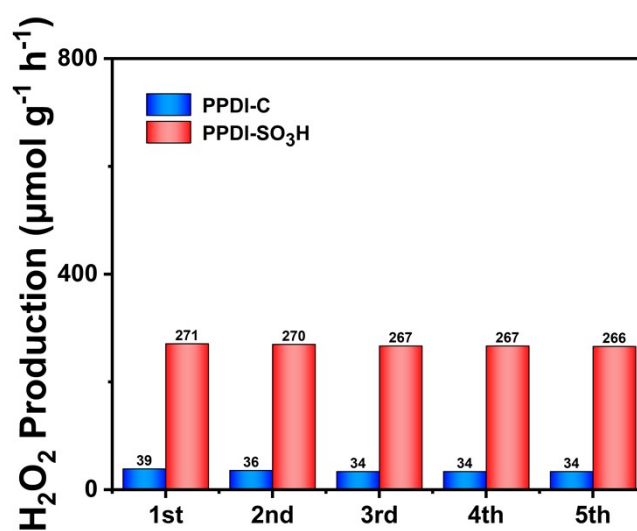

**Fig. S5** Cyclic stability of H<sub>2</sub>O<sub>2</sub> production over PPDI-SO<sub>3</sub>H and PPDI-C.

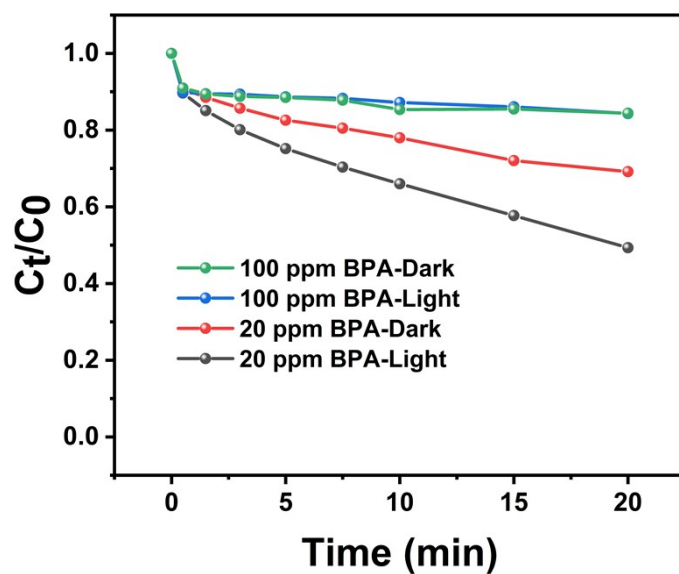

**Fig. S6** The photodegradation and dark adsorption performance of PPDI-C toward BPA with different initial concentrations.

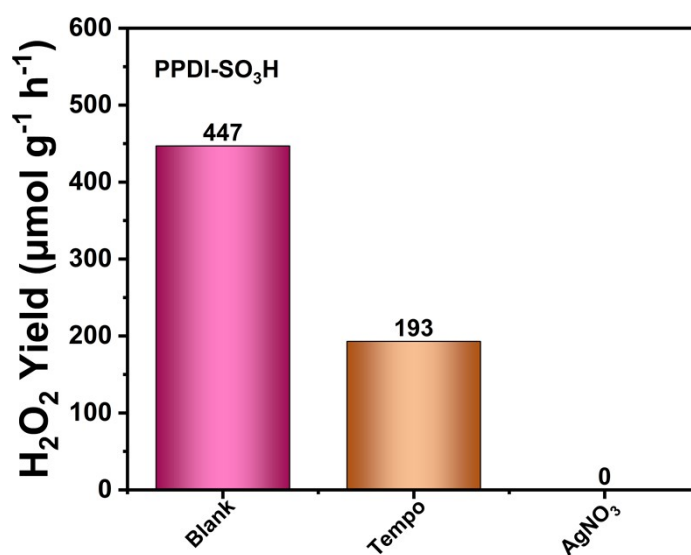

**Fig. S7** The quenching experiment of PPDI-SO<sub>3</sub>H in H<sub>2</sub>O<sub>2</sub> generation under an O<sub>2</sub> atmosphere.

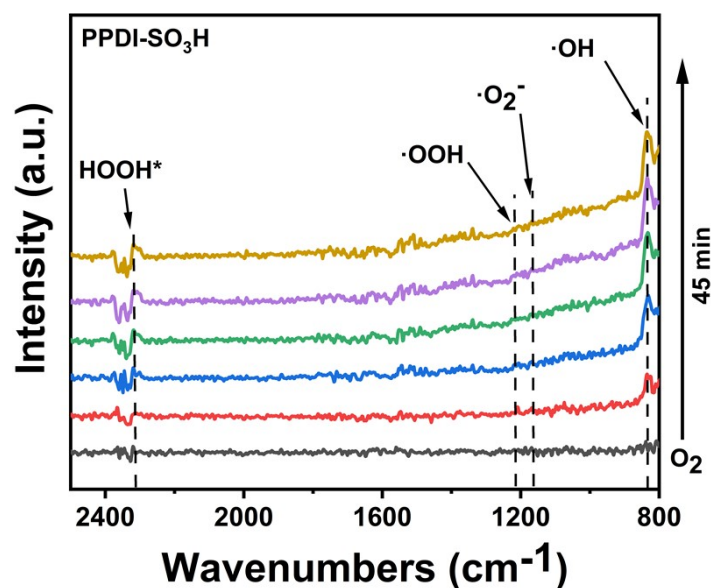

**Fig. S8** Time-dependent FT-IR spectrum of PPDI-SO<sub>3</sub>H.

**Table S1.** The comparison of the removal performance of PPDI-SO<sub>3</sub>H toward BPA under visible light irradiation.

|   | Catalyst Name                             | Catalyst Dosage | Initial BPA Concentration | Degradation Efficiency | Corresponding Time | Reference |
|---|-------------------------------------------|-----------------|---------------------------|------------------------|--------------------|-----------|
| 1 | 15%-In <sub>2</sub> O <sub>3</sub> /Cu-CN | 100 mg          | 20 mg/L                   | 91%                    | 180 min            | 1         |
| 2 | CoPorPc-CMP                               | 25 mg           | 20 mg/L                   | 75%                    | 30 min             | 2         |
| 3 | CBOI@BOB-6                                | 25 mg           | 20 mg/L                   | 93.6%                  | 30 min             | 3         |
| 4 | CdF@CM                                    | 100 mg          | 10 mg/L                   | 97%                    | 60 min             | 4         |
| 5 | 20-Co <sub>3</sub> O <sub>4</sub> /BOC    | 40 mg           | 10 mg/L                   | 84%                    | 175 min            | 5         |
| 6 | Co-W <sub>18</sub> O <sub>49</sub> /PDI   | 25 mg           | 10 mg/L                   | 91.2%                  | 150 min            | 6         |
| 7 | BOC/BOI-3                                 | 40 mg           | 15 mg/L                   | 97%                    | 90 min             | 7         |
| 8 | BT-Ni <sub>2</sub>                        | 50 mg           | 20 mg/L                   | 61%                    | 60 min             | 8         |
| 9 | PPDI-SO <sub>3</sub> H                    | 5 mg            | 100 mg/L                  | 97%                    | 20 min             | This work |
|   |                                           | 5 mg            | 20 mg/L                   | 99%                    | 10 min             |           |

## References

1. A. Uddin, A. Rauf, H. Luo, M. Basharat, M. Ikram, S. Zeb, M. Imran, Q.U. Hassan, Y. Gao, *Appl. Surf. Sci.*, 2023, **631**, 157531.
2. Q. Liu, Q. Sun, J. Shen, Y. Zhang, H. Li, Y. Zhang, Q. Li, G. Lu, S. Yu, X. Li, Y. Chen, *Appl. Surf. Sci.*, 2023, **638**, 158129.

3. J. Zhou, W. Zheng, F. Chen, S. Tu, H. Huang, *Sep. Purif. Technol.*, 2026,**383**, 136171.
4. M. Bilal, N. Abbas, K. Javed, Z. Mahmood, M.R.H. Shah Gilani, J.K. Ullah, S. Mahmood, S. Iqbal, K.A. Al-Hothaly, A.-E. Farouk, *Luminescence*, 2025, **40**, e70318.
5. S.T.U. Din, W.-F. Xie, W. Yang, *Int. J. Mol. Sci.*, 2022, **23**, 15028.
6. J. Liu, X. Gao, R. Wang, S. Zhu, X. Zhu, X. Zhu, D. Li, Q. Ruan, M. Cheng, B. Wang, H. Li, H. Xu, P.K. Chu, *Colloids Surf. A: Physicochem. Eng. Asp.*, 2024,**703**, 135050.
7. S.T.U. Din, H. Lee, W. Yang, *Nanomaterials*, 2022, **12**, 767.
8. I. Arora, S. Garg, A. Sapi, M. Yadav, A. Efremova, A. Szamosvölgyi, S. Upadhyay, U. Gupta, P.P. Ingole, M.M. Abdullah, *ACS Appl. Energy Mater.*, 2025, **8**, 13485–13498.
